# Supplementary material for: Photoluminescence tuning of Ca5(PO4)3Cl:Ce3+/Eu2+,Tb3+/Mn2+ phosphors: structure refinement, site occupancy, energy transfer and thermal stability
Source: Royal Society of Chemistry journal article supplement (doi:10.1039/c5tc03482e), 2015-12-30
Supplement: c5tc03482e1.pdf [file c5tc03482e1.pdf]

# **Photoluminescent tuning of $\text{Ca}_5(\text{PO}_4)_3\text{Cl}:\text{Ce}^{3+}/\text{Eu}^{2+}$ , $\text{Tb}^{3+}/\text{Mn}^{2+}$ phosphors: Structure refinement, site occupancy, energy transfer and thermal stability**

Ying Tian,<sup>a</sup> Yi Wei,<sup>a</sup> Yun Zhao,<sup>a</sup> Zewei Quan,<sup>d</sup> Guogang Li,<sup>a,c,\*</sup> and Jun Lin<sup>b,\*</sup>

<sup>a</sup> Faculty of Materials Science and Chemistry, China University of Geosciences, Wuhan 430074, People's Republic of China

<sup>b</sup> State Key Laboratory of Rare Earth Resource Utilization, Changchun Institute of Applied Chemistry, Chinese Academy of Sciences, Changchun 130022 (P. R. China)

<sup>c</sup> State Key Laboratory of Biogeology and Environmental Geology, China University of Geosciences, Wuhan 430074, People's Republic of China

<sup>d</sup> Department of Chemistry, South University of Science and Technology of China, Shenzhen, Guangdong 518055, P. R. China

\*Corresponding authors: J. Lin and G. G. Li

E-mail address: [jlin@ciac.ac.cn](mailto:jlin@ciac.ac.cn); [ggli8312@gmail.com](mailto:ggli8312@gmail.com)

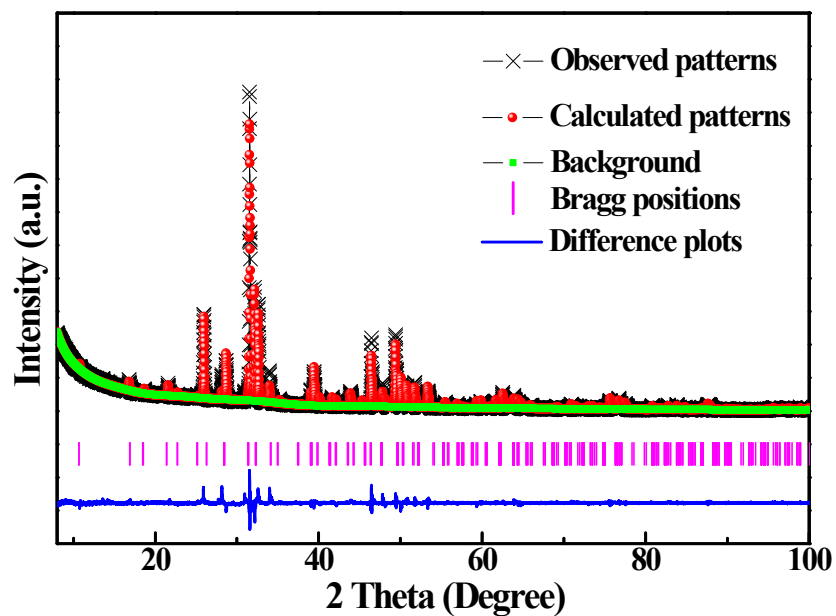

**Figure S1.** (a) Experimental (black crosses) and calculated (red solid line) XRD patterns and their difference (blue solid line) for the Rietveld fit of CPOCl:0.10Ce<sup>3+</sup> XRD pattern by the GSAS program. The short vertical lines show the positions of Bragg reflections of the calculated pattern.

**Table S1** Structure parameters of  $\text{CPOCl:0.10Ce}^{3+}$  derived from the GSAS refinement of XRD data.

| Atom        | Wyckoff position | X            | Y            | Z            |
|-------------|------------------|--------------|--------------|--------------|
| Ca1/Eu<br>1 | $4f$             | 0.3333000(0) | 0.6667000(0) | 0.0001000(0) |
| Ca2/Eu<br>2 | $6h$             | 0.2350800(0) | -            | 0.2500000(0) |
| P           | $6h$             | 0.4036710(0) | 0.3731130(0) | 0.2500000(0) |
| O1          | $6h$             | 0.3344100(0) | 0.4842290(0) | 0.2500000(0) |
| O2          | $6h$             | 0.5985850(0) | 0.4715580(0) | 0.2500000(0) |
| O3          | $12i$            | 0.3504860(0) | 0.2696650(0) | 0.0743480(0) |
| Cl          | $2b$             | 0.0000000(0) | 0.0000000(0) | 0.0000000(0) |

Cell parameters:  $a = b = 9.509 \text{ \AA}$ ,  $c = 6.865 \text{ \AA}$ ;  
 $\alpha = \beta = 90^\circ$ ,  $\gamma = 120^\circ$ ;

$V = 537.60 \text{ \AA}^3$  and  $Z = 2$ ;

Space group:  $P63/m$  (176);

Reliability factor:  $R_{\text{wp}} = 8.90\%$ ,  $R_{\text{p}} = 5.16\%$  and  $\chi^2 = 7.047$

**Table S2** Selected interatomic distances in CPOCl:0.10Ce<sup>3+</sup>.

| Bond                     | Length<br>(Å)  | Bond                        | Length<br>(Å)  |
|--------------------------|----------------|-----------------------------|----------------|
| Ca1/Ce1-<br>O1           | 2.4439(<br>29) | Ca2/Ce2-<br>O1              | 2.76999<br>(3) |
| Ca1/Ce1-<br>O1           | 2.4435(<br>29) | Ca2/Ce2-<br>O2              | 2.41764<br>(3) |
| Ca1/Ce1-<br>O1           | 2.4432(<br>29) | Ca2/Ce2-<br>O3              | 2.61004<br>(3) |
| Ca1/Ce1-<br>O2           | 2.4382(<br>29) | Ca2/Ce2-<br>O3              | 2.39620<br>(3) |
| Ca1/Ce1-<br>O2           | 2.4388(<br>29) | Ca2/Ce2-<br>O3              | 2.39620<br>(3) |
| Ca1/Ce1-<br>O2           | 2.4383(<br>29) | Ca2/Ce2-<br>O3              | 2.61004<br>(2) |
| Ca1/Ce1-<br>O3           | 2.8017(<br>7)  | Ca2/Ce2-C<br>11             | 2.85736<br>(3) |
| Ca1/Ce1-<br>O3           | 3.8008(<br>7)  | Ca2/Ce2-C<br>11             | 2.85736<br>(3) |
| Ca1/Ce1-<br>O3           | 2.8014(<br>7)  | —                           | —              |
| Average<br>Ca1/Ce1-<br>O | 2.67           | Average<br>Ca2/Ce2-<br>O/Cl | 2.61           |

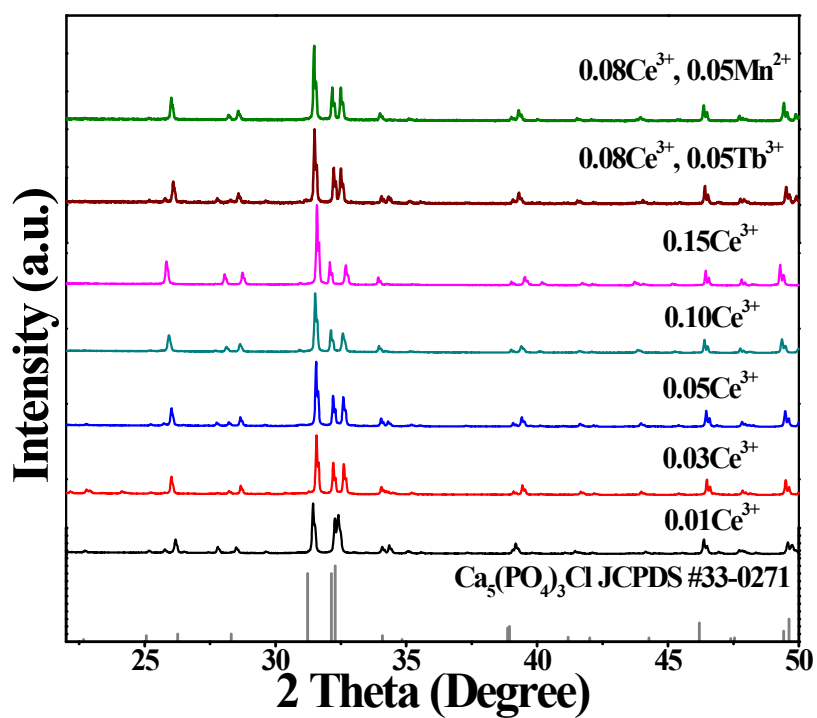

**Figure S2.** The XRD patterns of  $\text{Ca}_5(\text{PO}_4)_3\text{Cl}:m\text{Ce}^{3+}$  ( $m = 0.01, 0.03, 0.05, 0.10, 0.15$ ),  $\text{Ca}_5(\text{PO}_4)_3\text{Cl}:0.08\text{Ce}^{3+}, 0.05\text{Tb}^{3+}$ , and  $\text{Ca}_5(\text{PO}_4)_3\text{Cl}:0.08\text{Ce}^{3+}, 0.05\text{Mn}^{2+}$  samples. The standard  $\text{Ca}_5(\text{PO}_4)_3\text{Cl}$  data (JCPDS #33-0271) is shown as a reference.

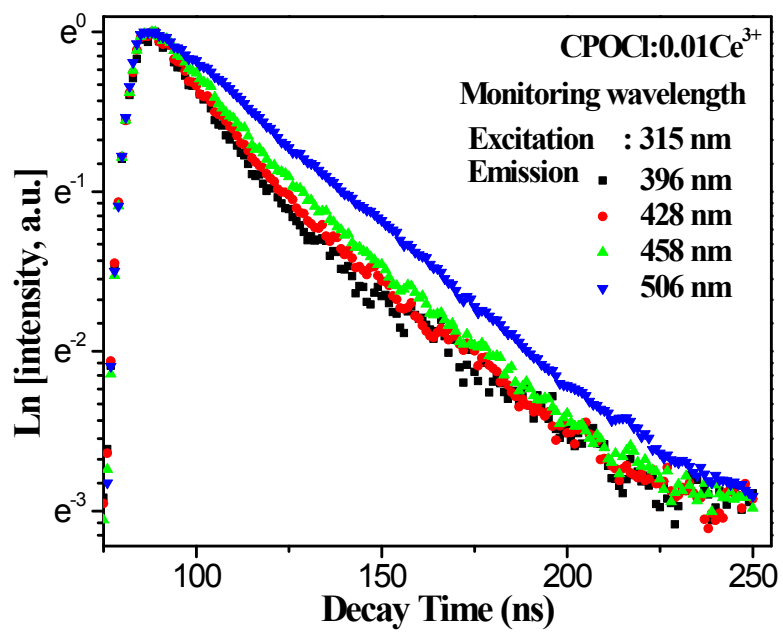

**Figure S3.** Decay curves of Ce<sup>3+</sup> emission monitored at 320 nm (Excitation) and different emissions (396, 428, 458, 506 nm) for CPOCl:0.01Ce<sup>3+</sup>.

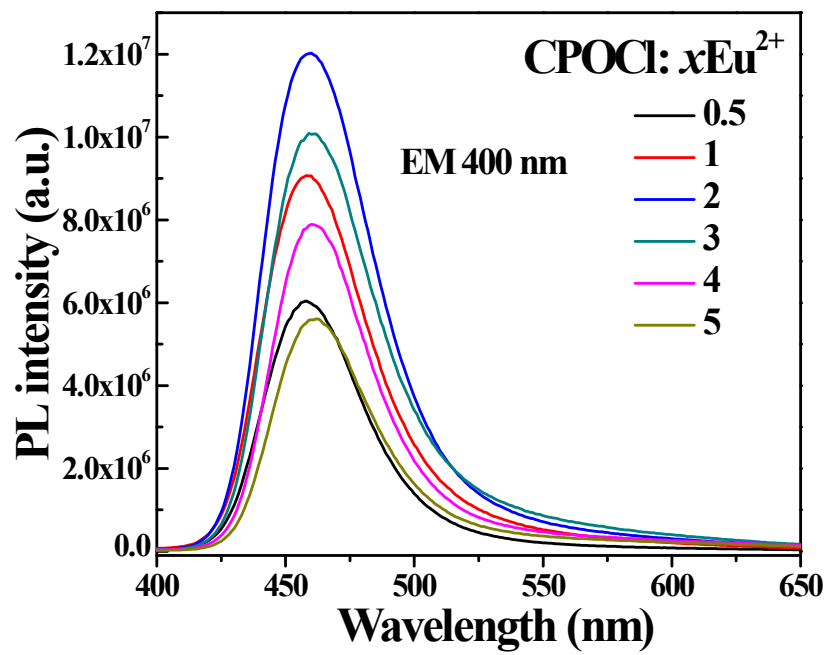

Figure S4. The PL spectra of CPOCl: $x\text{Eu}^{2+}$  ( $x = 0.5-5$  mol%) samples.

**Table S3** Selected interatomic distances in CPOCl:0.08Ce<sup>3+</sup> and  
CPOCl:0.08Ce<sup>3+</sup>, 0.05Mn<sup>2+</sup> samples

| Bond                                              | Length (Å) | Bond             | Length (Å) |
|---------------------------------------------------|------------|------------------|------------|
| CPOCl:0.08Ce <sup>3+</sup>                        |            |                  |            |
| Ca1_O1                                            | 2.43948(2) | Ca2_O1           | 2.79670(3) |
| Ca1_O1                                            | 2.43913(2) | Ca2_O2           | 2.38548(3) |
| Ca1_O1                                            | 2.43880(2) | Ca2_O3           | 2.56460(2) |
| Ca1_O2                                            | 2.43888(2) | Ca2_O3           | 2.35468(3) |
| Ca1_O2                                            | 2.43952(2) | Ca2_O3           | 2.35468(3) |
| Ca1_O2                                            | 2.43899(2) | Ca2_O3           | 2.56460(2) |
| Ca1_O3                                            | 2.81628(3) | Ca2_Cl1          | 2.90104(3) |
| Ca1_O3                                            | 2.81536(3) | Ca2_Cl1          | 2.90104(3) |
| Ca1_O3                                            | 2.81599(3) | _____            | _____      |
| Average Ca1-O                                     | 2.56       | Average Ca2-O/Cl | 2.62       |
| CPOCl:0.08Ce <sup>3+</sup> , 0.05Mn <sup>2+</sup> |            |                  |            |
| Ca1_O1                                            | 2.37860(2) | Ca2_O1           | 2.84134(3) |
| Ca1_O1                                            | 2.37824(2) | Ca2_O2           | 2.41043(2) |
| Ca1_O1                                            | 2.37791(2) | Ca2_O3           | 2.58481(2) |
| Ca1_O2                                            | 2.46873(2) | Ca2_O3           | 2.35194(2) |
| Ca1_O2                                            | 2.46936(2) | Ca2_O3           | 2.35194(2) |
| Ca1_O2                                            | 2.46883(2) | Ca2_O3           | 2.58481(2) |
| Ca1_O3                                            | 2.83179(2) | Ca2_Cl1          | 2.91804(2) |



| Bond          | Length (Å) | Bond             | Length (Å) |
|---------------|------------|------------------|------------|
| Ca1_O3        | 2.83087(2) | Ca2_Cl1          | 2.91804(2) |
| Ca1_O3        | 2.83150(2) | _____            | _____      |
| Average Ca1-O | 2.56       | Average Ca2-O/Cl | 2.60       |

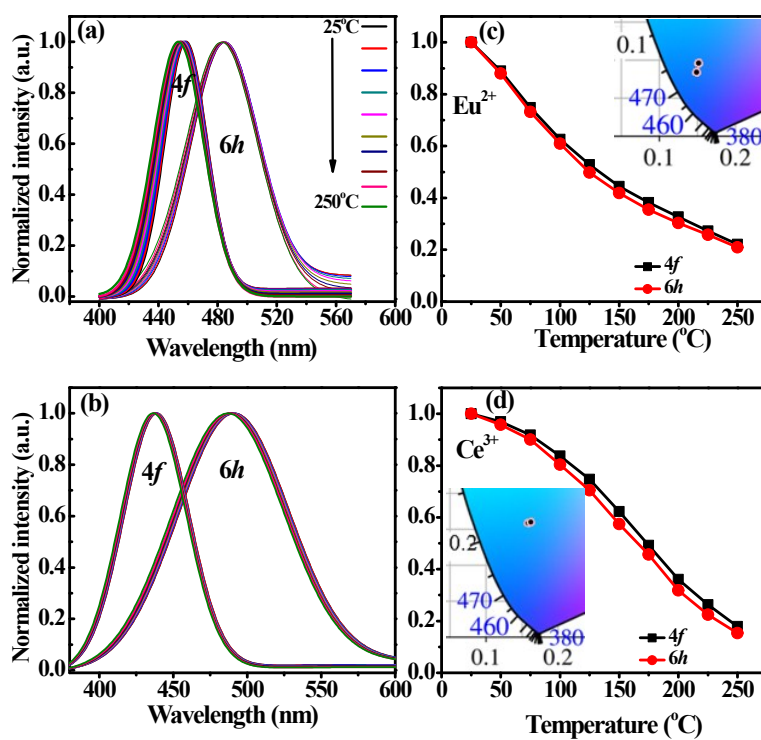

**Figure S5.** The Normalized Gaussian fitting PL spectra decomposed from  $4f$  and  $6h$  sites of (a)  $\text{CPOCl:0.02Eu}^{2+}$  and (c)  $\text{CPOCl:0.10Ce}^{3+}$  sample. The relative emission intensity of Gaussian fitting PL spectra decomposed from  $4f$  and  $6h$  sites of (c)  $\text{CPOCl:0.02Eu}^{2+}$  and (d)  $\text{CPOCl:0.10Ce}^{3+}$  sample with temperatures. The inserts in (c) and (d) are their CIE color coordinates at  $25^{\circ}\text{C}$  and  $250^{\circ}\text{C}$ .
